# Supplementary material for: Business disruptions from social distancing
Source: PLoS One. 2020 Sep 18;15(9):e0239113. doi: 10.1371/journal.pone.0239113 (PMC7500649; doi:10.1371/journal.pone.0239113)
Supplement: S1 Data — The percentage share of workers in teamwork-intensive, customer-facing, and physical-proximity occupations within the industry. “communication_share” refers to the share of workers who are either teamwork-intensive or customer-facing. “affected_share” refers to the share of workers in any of the three occupation groups. (CSV) [file pone.0239113.s001.csv]

industry_code	industry_label	teamwork_share	customer_share	presence_share	communication_share	affected_share	ces_employment
446	Health and personal care stores	29	90	0	90	90	1058.3
448	Clothing and clothing accessories stores	14	89	0	90	90	1289.1
447	Gasoline stations	13	83	3	83	86	947.20001
451	Sporting goods, hobby, book, and music stores	12	82	1	82	84	549.79999
452	General merchandise stores	11	73	1	73	74	3046.8
453	Miscellaneous store retailers	12	67	3	68	71	820.40002
621	Ambulatory health care services	24	65	2	67	67	7855.2002
444	Building material and garden supply stores	12	62	4	65	69	1309.3
442	Furniture and home furnishings stores	11	62	2	64	66	470.70001
445	Food and beverage stores	11	61	0	63	63	3090.2
622	Hospitals	42	60	2	61	62	5261
443	Electronics and appliance stores	10	53	9	54	61	475.29999
722	Food services and drinking places	7	52	0	53	53	12303.1
812	Personal and laundry services	9	48	1	51	52	1537.2
481	Air transportation	4	45	11	48	57	511.20001
441	Motor vehicle and parts dealers	11	43	23	44	65	2063.7
512	Motion picture and sound recording industries	21	43	0	43	44	456.29999
713	Amusements, gambling, and recreation	11	42	2	44	45	1785.5
712	Museums, historical sites, and similar institutions	14	41	4	43	46	175.2
532	Rental and leasing services	11	36	17	39	54	584.79999
721	Accommodation	17	35	5	38	43	2091
623	Nursing and residential care facilities	22	35	2	36	37	3391
487	Scenic and sightseeing transportation	7	34	23	37	60	36.700001
521	Monetary authorities, Credit intermediation and related activities	8	31	0	37	37	2699.8
813	Membership associations and organizations	14	30	1	31	32	3025.6001
561	Administrative and support services	17	25	5	28	32	8928
454	Nonstore retailers	11	24	8	30	36	551.20001
711	Performing arts and spectator sports	15	24	3	27	29	511.70001
312	Miscellaneous nondurable goods manufacturing	8	21	11	25	35	323.5
524	Insurance carriers and related activities	7	19	0	22	22	2817.8
531	Real estate	9	18	22	20	39	1750
611	Educational services	15	18	1	19	20	3828.5
624	Social assistance	7	17	1	18	19	4250.5
515	Broadcasting, except Internet	5	16	4	17	21	263.29999
533	Lessors of nonfinancial intangible assets	12	15	0	16	17	23.700001
517	Telecommunications	5	14	33	16	47	700.5
221	Utilities	15	14	29	20	43	546.09998
551	Management of companies and enterprises	9	13	2	16	18	2447.3
423	Wholesale trade: Durable goods	9	13	13	16	28	3221
488	Support activities for transportation	9	12	28	16	43	763.79999
811	Repair and maintenance	10	12	48	16	59	1378.6
425	Electronic markets and agents and brokers	6	11	5	14	18	532.79999
518	Data processing, hosting and related services	5	11	1	13	14	349.60001
424	Wholesale trade: Nondurable goods	8	10	11	14	25	2180.3999
541	Professional and technical services	5	10	1	12	13	9707.5996
237	Heavy and civil engineering construction	17	9	36	17	47	1098.9
519	Other information services	5	9	0	10	11	354.39999
323	Printing and related support activities	8	9	3	14	16	417.20001
115	Support Activities for Agriculture and Forestry	13	8	14	19	33
339	Miscellaneous durable goods manufacturing	7	7	4	10	14	622.90002
483	Water transportation	5	7	63	9	72	64.900002
523	Securities, commodity contracts, investments, and funds and trusts	5	7	0	9	9	968.79999
311	Food manufacturing	7	7	11	11	22	1655.4
114	Fishing, Hunting and Trapping	2	7	7	8	14
511	Publishing industries, except Internet	4	6	0	8	8	770
482	Rail transportation	9	6	39	12	48	159.89999
315	Apparel	7	6	2	10	12	105
314	Textile product mills	8	5	6	10	16	111.3
562	Waste management and remediation services	10	5	43	11	54	467
486	Pipeline transportation	10	5	27	10	36	50.5
325	Chemicals	8	5	9	10	18	851.09998
213	Support activities for mining	31	4	41	31	52	314.5
322	Paper and paper products	8	4	16	10	24	363.60001
313	Textile mills	7	4	10	9	18	106.5
212	Mining, except oil and gas	12	4	61	13	70	188.60001
335	Electrical equipment and appliances	6	4	7	8	15	404.5
324	Petroleum and coal products	12	4	19	12	29	114.3
327	Nonmetallic mineral products	8	4	29	9	38	425.60001
211	Oil and gas extraction	17	4	15	17	24	156.60001
334	Computer and electronic products	5	4	3	6	9	1098.2
492	Couriers and messengers	12	4	12	14	26	847.79999
493	Warehousing and storage	8	4	24	10	34	1207.8
337	Furniture and related products	7	4	4	9	13	386.39999
238	Specialty trade contractors	15	4	34	16	42	4850.7002
236	Construction of buildings	15	4	7	16	22	1689.1
485	Transit and ground passenger transportation	9	4	5	12	16	508.20001
333	Machinery	7	4	10	9	18	1109.9
326	Plastics and rubber products	8	4	10	9	19	746.20001
332	Fabricated metal products	8	4	11	9	20	1483.9
331	Primary metals	8	3	24	9	32	372.70001
484	Truck transportation	5	3	66	7	72	1527.3
321	Wood products	8	3	14	9	21	410.60001
336	Transportation equipment	6	2	11	7	17	1742.9
113	Forestry and logging	4	1	23	4	26	54.5
